# Supplementary material
Source: PubMed Central journal article supplement (PMC7194072)
Supplement: mmc1.pdf [file mmc1.pdf]

## Appendix Table 1: Actual State EITC Rates (2010-2012)

| 2010         |                 |                               | 2011         |                 |                               |
|--------------|-----------------|-------------------------------|--------------|-----------------|-------------------------------|
| State        | State EITC Rate | Refundable State EITC (1=Yes) | State        | State EITC Rate | Refundable State EITC (1=Yes) |
| Abbreviation |                 |                               | Abbreviation |                 |                               |
| AL           | 0               | 0                             | AL           | 0               | 0                             |
| AK           | 0               | 0                             | AK           | 0               | 0                             |
| AZ           | 0               | 0                             | AZ           | 0               | 0                             |
| AR           | 0               | 0                             | AR           | 0               | 0                             |
| CA           | 0               | 0                             | CA           | 0               | 0                             |
| CO           | 0               | 0                             | CO           | 0               | 0                             |
| CT           | 0               | 0                             | CT           | 0.3             | 1                             |
| DE           | 0.2             | 0                             | DE           | 0.2             | 0                             |
| DC           | 0.4             | 1                             | DC           | 0.4             | 1                             |
| FL           | 0               | 0                             | FL           | 0               | 0                             |
| GA           | 0               | 0                             | GA           | 0               | 0                             |
| HI           | 0               | 0                             | HI           | 0               | 0                             |
| ID           | 0               | 0                             | ID           | 0               | 0                             |
| IL           | 0.05            | 1                             | IL           | 0.04            | 1                             |
| IN           | 0.09            | 1                             | IN           | 0.06            | 1                             |
| IA           | 0.07            | 1                             | IA           | 0.07            | 1                             |
| KS           | 0.18            | 1                             | KS           | 0.18            | 1                             |
| KY           | 0               | 0                             | KY           | 0               | 0                             |
| LA           | 0.035           | 1                             | LA           | 0.035           | 1                             |
| ME           | 0.05            | 0                             | ME           | 0.05            | 0                             |
| MD           | 0.25            | 1                             | MD           | 0.25            | 1                             |
| MA           | 0.15            | 1                             | MA           | 0.15            | 1                             |
| MI           | 0.2             | 1                             | MI           | 0.06            | 1                             |
| MN           | 0.33            | 1                             | MN           | 0.33            | 1                             |
| MS           | 0               | 0                             | MS           | 0               | 0                             |
| MO           | 0               | 0                             | MO           | 0               | 0                             |
| MT           | 0               | 0                             | MT           | 0               | 0                             |
| NE           | 0.1             | 1                             | NE           | 0.1             | 1                             |
| NV           | 0               | 0                             | NV           | 0               | 0                             |
| NH           | 0               | 0                             | NH           | 0               | 0                             |
| NJ           | 0.2             | 1                             | NJ           | 0.2             | 1                             |
| NM           | 0.1             | 1                             | NM           | 0.1             | 1                             |
| NY           | 0.3             | 1                             | NY           | 0.3             | 1                             |

|    |              |      |
|----|--------------|------|
| NC | 0.05         | 1    |
| ND | 0            | 0    |
| OH | 0            | 0    |
| OK | 0.05         | 1    |
| OR | 0.06         | 1    |
| PA | 0            | 0    |
| RI | 0.25         | 1    |
| SC | 0            | 0    |
| SD | 0            | 0    |
| TN | 0            | 0    |
| TX | 0            | 0    |
| UT | 0            | 0    |
| VT | 0.32         | 1    |
| VA | 0.2          | 0    |
| WA | 0            | 1    |
| WV | 0            | 0    |
| WI | 0.04         | 1    |
| WY | 0            | 0    |
| WI | 3 dependents | 0.43 |

|    |              |      |
|----|--------------|------|
| NC | 0.05         | 1    |
| ND | 0            | 0    |
| OH | 0            | 0    |
| OK | 0.05         | 1    |
| OR | 0.06         | 1    |
| PA | 0            | 0    |
| RI | 0.25         | 1    |
| SC | 0            | 0    |
| SD | 0            | 0    |
| TN | 0            | 0    |
| TX | 0            | 0    |
| UT | 0            | 0    |
| VT | 0.32         | 1    |
| VA | 0.2          | 0    |
| WA | 0            | 1    |
| WV | 0            | 0    |
| WI | 0.04         | 1    |
| WY | 0            | 0    |
| WI | 3 dependents | 0.34 |

| State<br>Abbreviation | 2012               |  | Refundable<br>State EITC<br>(1=Yes) | Change<br>between<br>2011 and<br>2010 | Change<br>between<br>2012 and<br>2011 |
|-----------------------|--------------------|--|-------------------------------------|---------------------------------------|---------------------------------------|
|                       | State EITC<br>Rate |  |                                     |                                       |                                       |
| AL                    | 0                  |  | 0                                   | 0                                     | 0                                     |
| AK                    | 0                  |  | 0                                   | 0                                     | 0                                     |
| AZ                    | 0                  |  | 0                                   | 0                                     | 0                                     |
| AR                    | 0                  |  | 0                                   | 0                                     | 0                                     |
| CA                    | 0                  |  | 0                                   | 0                                     | 0                                     |
| CO                    | 0                  |  | 0                                   | 0                                     | 0                                     |
| CT                    | 0.3                |  | 1                                   | 0.3                                   | 0                                     |
| DE                    | 0.2                |  | 0                                   | 0                                     | 0                                     |
| DC                    | 0.4                |  | 1                                   | 0                                     | 0                                     |
| FL                    | 0                  |  | 0                                   | 0                                     | 0                                     |
| GA                    | 0                  |  | 0                                   | 0                                     | 0                                     |
| HI                    | 0                  |  | 0                                   | 0                                     | 0                                     |
| ID                    | 0                  |  | 0                                   | 0                                     | 0                                     |
| IL                    | 0.05               |  | 1                                   | -0.01                                 | 0.01                                  |
| IN                    | 0.06               |  | 1                                   | -0.03                                 | 0                                     |
| IA                    | 0.07               |  | 1                                   | 0                                     | 0                                     |
| KS                    | 0.18               |  | 1                                   | 0                                     | 0                                     |
| KY                    | 0                  |  | 0                                   | 0                                     | 0                                     |
| LA                    | 0.035              |  | 1                                   | 0                                     | 0                                     |
| ME                    | 0.05               |  | 0                                   | 0                                     | 0                                     |
| MD                    | 0.25               |  | 1                                   | 0                                     | 0                                     |
| MA                    | 0.15               |  | 1                                   | 0                                     | 0                                     |
| MI                    | 0.06               |  | 1                                   | -0.14                                 | 0                                     |
| MN                    | 0.33               |  | 1                                   | 0                                     | 0                                     |
| MS                    | 0                  |  | 0                                   | 0                                     | 0                                     |
| MO                    | 0                  |  | 0                                   | 0                                     | 0                                     |
| MT                    | 0                  |  | 0                                   | 0                                     | 0                                     |
| NE                    | 0.1                |  | 1                                   | 0                                     | 0                                     |
| NV                    | 0                  |  | 0                                   | 0                                     | 0                                     |
| NH                    | 0                  |  | 0                                   | 0                                     | 0                                     |
| NJ                    | 0.2                |  | 1                                   | 0                                     | 0                                     |
| NM                    | 0.1                |  | 1                                   | 0                                     | 0                                     |
| NY                    | 0.3                |  | 1                                   | 0                                     | 0                                     |

|    |              |      |  |   |   |
|----|--------------|------|--|---|---|
| NC | 0.05         | 1    |  | 0 | 0 |
| ND | 0            | 0    |  | 0 | 0 |
| OH | 0            | 0    |  | 0 | 0 |
| OK | 0.05         | 1    |  | 0 | 0 |
| OR | 0.06         | 1    |  | 0 | 0 |
| PA | 0            | 0    |  | 0 | 0 |
| RI | 0.25         | 1    |  | 0 | 0 |
| SC | 0            | 0    |  | 0 | 0 |
| SD | 0            | 0    |  | 0 | 0 |
| TN | 0            | 0    |  | 0 | 0 |
| TX | 0            | 0    |  | 0 | 0 |
| UT | 0            | 0    |  | 0 | 0 |
| VT | 0.32         | 1    |  | 0 | 0 |
| VA | 0.2          | 0    |  | 0 | 0 |
| WA | 0            | 1    |  | 0 | 0 |
| WV | 0            | 0    |  | 0 | 0 |
| WI | 0.04         | 1    |  | 0 | 0 |
| WY | 0            | 0    |  | 0 | 0 |
| WI | 3 dependents | 0.34 |  |   |   |

**Appendix Table 2: Proportion receiving benefit before and after simulations**

| State name           | Proportion eligible for TANF who receive the benefit prior to the simulation | Proportion eligible for TANF who receive the benefit after the simulation | Proportion receiving their state's EITC prior to the simulation | Proportion receiving a state EITC after the simulation | Proportion eligible for SNAP who receive the benefit prior to the simulation | Proportion eligible for SNAP who receive the benefit after the simulation | Proportion receiving a state CTC prior to the simulation | Proportion receiving the state CTC after the simulation |
|----------------------|------------------------------------------------------------------------------|---------------------------------------------------------------------------|-----------------------------------------------------------------|--------------------------------------------------------|------------------------------------------------------------------------------|---------------------------------------------------------------------------|----------------------------------------------------------|---------------------------------------------------------|
| Alabama              | 0.16                                                                         | 0.59                                                                      | 0.00                                                            | 0.39                                                   | 0.82                                                                         | 0.93                                                                      | 0.00                                                     | 0.66                                                    |
| Alaska               | 0.20                                                                         | 0.59                                                                      | 0.00                                                            | 0.30                                                   | 0.73                                                                         | 0.94                                                                      | 0.00                                                     | 0.67                                                    |
| Arizona              | 0.18                                                                         | 0.55                                                                      | 0.00                                                            | 0.41                                                   | 0.76                                                                         | 0.92                                                                      | 0.00                                                     | 0.71                                                    |
| Arkansas             | 0.10                                                                         | 0.60                                                                      | 0.00                                                            | 0.43                                                   | 0.86                                                                         | 0.94                                                                      | 0.00                                                     | 0.68                                                    |
| California           | 0.56                                                                         | 0.56                                                                      | 0.00                                                            | 0.41                                                   | 0.68                                                                         | 0.92                                                                      | 0.00                                                     | 0.65                                                    |
| Colorado             | 0.26                                                                         | 0.59                                                                      | 0.00                                                            | 0.29                                                   | 0.75                                                                         | 0.93                                                                      | 0.00                                                     | 0.64                                                    |
| Connecticut          | 0.34                                                                         | 0.60                                                                      | 0.24                                                            | 0.24                                                   | 0.84                                                                         | 0.93                                                                      | 0.00                                                     | 0.60                                                    |
| Delaware             | 0.31                                                                         | 0.58                                                                      | 0.06                                                            | 0.36                                                   | 0.85                                                                         | 0.91                                                                      | 0.00                                                     | 0.69                                                    |
| District of Columbia | 0.56                                                                         | 0.58                                                                      | 0.34                                                            | 0.34                                                   | 0.93                                                                         | 0.93                                                                      | 0.00                                                     | 0.44                                                    |
| Florida              | 0.13                                                                         | 0.59                                                                      | 0.00                                                            | 0.39                                                   | 0.89                                                                         | 0.93                                                                      | 0.00                                                     | 0.68                                                    |
| Georgia              | 0.08                                                                         | 0.59                                                                      | 0.00                                                            | 0.40                                                   | 0.81                                                                         | 0.94                                                                      | 0.00                                                     | 0.67                                                    |
| Hawaii               | 0.42                                                                         | 0.60                                                                      | 0.00                                                            | 0.43                                                   | 0.85                                                                         | 0.94                                                                      | 0.00                                                     | 0.67                                                    |
| Idaho                | 0.09                                                                         | 0.60                                                                      | 0.00                                                            | 0.42                                                   | 0.74                                                                         | 0.91                                                                      | 0.00                                                     | 0.76                                                    |
| Illinois             | 0.21                                                                         | 0.59                                                                      | 0.39                                                            | 0.39                                                   | 0.86                                                                         | 0.94                                                                      | 0.00                                                     | 0.68                                                    |
| Indiana              | 0.19                                                                         | 0.59                                                                      | 0.37                                                            | 0.37                                                   | 0.83                                                                         | 0.93                                                                      | 0.00                                                     | 0.69                                                    |
| Iowa                 | 0.54                                                                         | 0.59                                                                      | 0.34                                                            | 0.34                                                   | 0.84                                                                         | 0.93                                                                      | 0.00                                                     | 0.71                                                    |
| Kansas               | 0.19                                                                         | 0.58                                                                      | 0.40                                                            | 0.40                                                   | 0.81                                                                         | 0.94                                                                      | 0.00                                                     | 0.69                                                    |
| Kentucky             | 0.26                                                                         | 0.58                                                                      | 0.00                                                            | 0.40                                                   | 0.91                                                                         | 0.93                                                                      | 0.00                                                     | 0.68                                                    |
| Louisiana            | 0.09                                                                         | 0.58                                                                      | 0.38                                                            | 0.38                                                   | 0.87                                                                         | 0.94                                                                      | 0.00                                                     | 0.63                                                    |
| Maine                | 0.70                                                                         | 0.70                                                                      | 0.06                                                            | 0.33                                                   | 0.95                                                                         | 0.95                                                                      | 0.00                                                     | 0.66                                                    |
| Maryland             | 0.29                                                                         | 0.58                                                                      | 0.29                                                            | 0.29                                                   | 0.83                                                                         | 0.92                                                                      | 0.00                                                     | 0.62                                                    |
| Massachusetts        | 0.43                                                                         | 0.59                                                                      | 0.26                                                            | 0.26                                                   | 0.84                                                                         | 0.94                                                                      | 0.00                                                     | 0.59                                                    |
| Michigan             | 0.32                                                                         | 0.59                                                                      | 0.31                                                            | 0.31                                                   | 0.93                                                                         | 0.94                                                                      | 0.00                                                     | 0.68                                                    |
| Minnesota            | 0.37                                                                         | 0.60                                                                      | 0.26                                                            | 0.26                                                   | 0.86                                                                         | 0.94                                                                      | 0.00                                                     | 0.68                                                    |
| Mississippi          | 0.20                                                                         | 0.59                                                                      | 0.00                                                            | 0.40                                                   | 0.92                                                                         | 0.94                                                                      | 0.00                                                     | 0.67                                                    |
| Missouri             | 0.44                                                                         | 0.59                                                                      | 0.00                                                            | 0.34                                                   | 0.83                                                                         | 0.94                                                                      | 0.00                                                     | 0.67                                                    |
| Montana              | 0.21                                                                         | 0.60                                                                      | 0.00                                                            | 0.40                                                   | 0.85                                                                         | 0.94                                                                      | 0.00                                                     | 0.69                                                    |
| Nebraska             | 0.34                                                                         | 0.59                                                                      | 0.34                                                            | 0.34                                                   | 0.72                                                                         | 0.92                                                                      | 0.00                                                     | 0.70                                                    |
| Nevada               | 0.22                                                                         | 0.55                                                                      | 0.00                                                            | 0.44                                                   | 0.75                                                                         | 0.91                                                                      | 0.00                                                     | 0.70                                                    |
| New Hampshire        | 0.50                                                                         | 0.60                                                                      | 0.00                                                            | 0.22                                                   | 0.91                                                                         | 0.95                                                                      | 0.00                                                     | 0.65                                                    |
| New Jersey           | 0.27                                                                         | 0.57                                                                      | 0.28                                                            | 0.28                                                   | 0.82                                                                         | 0.94                                                                      | 0.00                                                     | 0.59                                                    |
| New Mexico           | 0.38                                                                         | 0.61                                                                      | 0.44                                                            | 0.44                                                   | 0.86                                                                         | 0.93                                                                      | 0.00                                                     | 0.68                                                    |
| New York             | 0.45                                                                         | 0.60                                                                      | 0.37                                                            | 0.37                                                   | 0.83                                                                         | 0.94                                                                      | 0.64                                                     | 0.64                                                    |
| North Carolina       | 0.09                                                                         | 0.59                                                                      | 0.40                                                            | 0.40                                                   | 0.86                                                                         | 0.92                                                                      | 0.62                                                     | 0.68                                                    |
| North Dakota         | 0.20                                                                         | 0.59                                                                      | 0.00                                                            | 0.27                                                   | 0.91                                                                         | 0.94                                                                      | 0.00                                                     | 0.70                                                    |
| Ohio                 | 0.36                                                                         | 0.59                                                                      | 0.00                                                            | 0.37                                                   | 0.86                                                                         | 0.94                                                                      | 0.00                                                     | 0.70                                                    |
| Oklahoma             | 0.16                                                                         | 0.59                                                                      | 0.39                                                            | 0.39                                                   | 0.79                                                                         | 0.94                                                                      | 0.52                                                     | 0.69                                                    |
| Oregon               | 0.59                                                                         | 0.59                                                                      | 0.41                                                            | 0.41                                                   | 0.84                                                                         | 0.93                                                                      | 0.00                                                     | 0.72                                                    |
| Pennsylvania         | 0.39                                                                         | 0.59                                                                      | 0.00                                                            | 0.32                                                   | 0.88                                                                         | 0.94                                                                      | 0.00                                                     | 0.66                                                    |
| Rhode Island         | 0.36                                                                         | 0.60                                                                      | 0.32                                                            | 0.32                                                   | 0.89                                                                         | 0.94                                                                      | 0.00                                                     | 0.66                                                    |
| South Carolina       | 0.24                                                                         | 0.58                                                                      | 0.00                                                            | 0.39                                                   | 0.84                                                                         | 0.94                                                                      | 0.00                                                     | 0.68                                                    |
| South Dakota         | 0.28                                                                         | 0.60                                                                      | 0.00                                                            | 0.36                                                   | 0.86                                                                         | 0.94                                                                      | 0.00                                                     | 0.72                                                    |
| Tennessee            | 0.38                                                                         | 0.59                                                                      | 0.00                                                            | 0.42                                                   | 0.82                                                                         | 0.93                                                                      | 0.00                                                     | 0.71                                                    |
| Texas                | 0.12                                                                         | 0.56                                                                      | 0.00                                                            | 0.45                                                   | 0.74                                                                         | 0.91                                                                      | 0.00                                                     | 0.71                                                    |

|                          |      |      |      |      |      |      |      |      |
|--------------------------|------|------|------|------|------|------|------|------|
| Utah                     | 0.18 | 0.58 | 0.00 | 0.34 | 0.68 | 0.94 | 0.00 | 0.76 |
| Vermont                  | 0.41 | 0.62 | 0.32 | 0.32 | 0.92 | 0.94 | 0.00 | 0.69 |
| Virginia                 | 0.28 | 0.59 | 0.07 | 0.28 | 0.78 | 0.93 | 0.00 | 0.63 |
| Washington               | 0.55 | 0.60 | 0.00 | 0.35 | 0.89 | 0.94 | 0.00 | 0.67 |
| West Virginia            | 0.19 | 0.59 | 0.00 | 0.36 | 0.89 | 0.94 | 0.00 | 0.66 |
| Wisconsin                | 0.28 | 0.60 | 0.32 | 0.32 | 0.90 | 0.94 | 0.00 | 0.72 |
| Wyoming                  | 0.17 | 0.60 | 0.00 | 0.30 | 0.76 | 0.94 | 0.00 | 0.71 |
| <b>Nation as a whole</b> | 0.29 | 0.58 | 0.13 | 0.37 | 0.81 | 0.93 | 0.06 | 0.67 |

*Note: This table documents benefit receipt among the entire state population, not just children, within each state.*

**Appendix Table 3: Average annual benefit amount received in each simulation**

| State name           | Average TANF benefit amount received <100% PL in simulation | Average TANF benefit amount received 100-200% PL in simulation | Average TANF benefit amount received >200% PL in simulation | Average EITC benefit amount received <100% PL in simulation | Average EITC benefit amount received 100-200% PL in simulation | Average EITC benefit amount received >200% PL in simulation | Average SNAP benefit amount received <100% PL in simulation | Average SNAP benefit amount received 100-200% PL in simulation |
|----------------------|-------------------------------------------------------------|----------------------------------------------------------------|-------------------------------------------------------------|-------------------------------------------------------------|----------------------------------------------------------------|-------------------------------------------------------------|-------------------------------------------------------------|----------------------------------------------------------------|
| Alabama              | \$2,249.37                                                  | \$2,208.24                                                     |                                                             | \$985.08                                                    | \$1,433.83                                                     | \$1,099.25                                                  | \$5,875.32                                                  | \$3,355.06                                                     |
| Alaska               | \$5,120.73                                                  | \$5,163.66                                                     |                                                             | \$1,147.15                                                  | \$1,194.83                                                     | \$751.04                                                    | \$6,872.76                                                  | \$4,599.48                                                     |
| Arizona              | \$2,351.75                                                  | \$2,310.62                                                     |                                                             | \$1,521.60                                                  | \$1,312.91                                                     | \$922.87                                                    | \$7,325.41                                                  | \$4,942.20                                                     |
| Arkansas             | \$1,856.01                                                  | \$2,067.67                                                     |                                                             | \$1,092.87                                                  | \$1,424.14                                                     | \$957.54                                                    | \$4,922.73                                                  | \$3,583.57                                                     |
| California           |                                                             |                                                                |                                                             | \$1,514.85                                                  | \$1,279.03                                                     | \$844.60                                                    | \$5,658.60                                                  | \$4,458.41                                                     |
| Colorado             | \$4,285.51                                                  | \$4,513.08                                                     |                                                             | \$1,395.69                                                  | \$1,340.85                                                     | \$860.74                                                    | \$5,139.22                                                  | \$3,572.86                                                     |
| Connecticut          | \$6,881.15                                                  | \$6,807.46                                                     |                                                             |                                                             |                                                                |                                                             | \$5,179.14                                                  | \$4,224.30                                                     |
| Delaware             | \$4,506.90                                                  | \$4,485.96                                                     |                                                             | \$1,366.62                                                  | \$1,405.07                                                     | \$966.51                                                    | \$5,995.69                                                  | \$3,840.53                                                     |
| District of Columbia | \$7,523.80                                                  |                                                                |                                                             |                                                             |                                                                |                                                             |                                                             |                                                                |
| Florida              | \$2,280.85                                                  | \$2,296.24                                                     |                                                             | \$1,332.67                                                  | \$1,249.91                                                     | \$880.05                                                    | \$6,671.89                                                  | \$4,234.48                                                     |
| Georgia              | \$2,310.05                                                  | \$2,330.71                                                     |                                                             | \$1,256.58                                                  | \$1,363.93                                                     | \$1,007.60                                                  | \$5,556.63                                                  | \$4,302.91                                                     |
| Hawaii               | \$7,256.13                                                  | \$7,024.49                                                     |                                                             | \$1,289.87                                                  | \$1,451.82                                                     | \$918.51                                                    | \$6,359.45                                                  | \$5,790.71                                                     |
| Idaho                | \$1,970.86                                                  | \$1,925.15                                                     |                                                             | \$1,061.87                                                  | \$1,496.50                                                     | \$1,183.95                                                  | \$5,270.47                                                  | \$3,950.74                                                     |
| Illinois             | \$4,533.38                                                  | \$4,371.92                                                     |                                                             |                                                             |                                                                |                                                             | \$4,759.68                                                  | \$3,785.30                                                     |
| Indiana              | \$2,322.08                                                  | \$2,223.61                                                     |                                                             |                                                             |                                                                |                                                             | \$5,232.85                                                  | \$3,754.86                                                     |
| Iowa                 | \$4,341.20                                                  | \$4,407.79                                                     |                                                             |                                                             |                                                                |                                                             | \$5,853.17                                                  | \$3,976.34                                                     |
| Kansas               | \$4,446.24                                                  | \$4,359.08                                                     |                                                             |                                                             |                                                                |                                                             | \$5,974.85                                                  | \$3,747.84                                                     |
| Kentucky             | \$2,081.54                                                  | \$2,296.60                                                     |                                                             | \$948.94                                                    | \$1,377.73                                                     | \$1,099.98                                                  | \$4,059.72                                                  | \$4,023.39                                                     |
| Louisiana            | \$2,310.07                                                  | \$2,327.51                                                     |                                                             |                                                             |                                                                |                                                             | \$6,238.99                                                  | \$4,373.21                                                     |
| Maine                |                                                             |                                                                |                                                             | \$1,168.57                                                  | \$1,275.09                                                     | \$1,081.48                                                  |                                                             |                                                                |
| Maryland             | \$7,277.42                                                  | \$6,983.69                                                     |                                                             |                                                             |                                                                |                                                             | \$4,645.12                                                  | \$3,882.39                                                     |
| Massachusetts        | \$7,061.55                                                  | \$6,761.56                                                     |                                                             |                                                             |                                                                |                                                             | \$5,039.54                                                  | \$4,059.91                                                     |
| Michigan             | \$7,139.62                                                  | \$7,110.07                                                     |                                                             |                                                             |                                                                |                                                             | \$7,398.25                                                  | \$6,430.85                                                     |
| Minnesota            | \$4,508.94                                                  | \$4,480.38                                                     |                                                             |                                                             |                                                                |                                                             | \$6,796.66                                                  | \$4,266.92                                                     |
| Mississippi          | \$2,297.63                                                  | \$2,296.49                                                     |                                                             | \$988.02                                                    | \$1,384.11                                                     | \$1,240.51                                                  |                                                             | \$4,349.40                                                     |
| Missouri             | \$2,424.28                                                  | \$2,342.36                                                     |                                                             | \$1,043.68                                                  | \$1,398.36                                                     | \$831.73                                                    | \$5,766.92                                                  | \$4,046.59                                                     |
| Montana              | \$3,985.87                                                  | \$4,388.71                                                     |                                                             | \$980.49                                                    | \$1,309.83                                                     | \$1,137.52                                                  |                                                             | \$3,902.24                                                     |
| Nebraska             | \$4,349.12                                                  | \$4,374.46                                                     |                                                             |                                                             |                                                                |                                                             | \$6,613.58                                                  | \$4,667.93                                                     |
| Nevada               | \$4,482.51                                                  |                                                                |                                                             | \$1,415.64                                                  | \$1,226.39                                                     | \$1,006.42                                                  | \$5,928.42                                                  | \$4,208.17                                                     |
| New Hampshire        | \$4,512.06                                                  |                                                                |                                                             | \$1,221.37                                                  | \$1,167.84                                                     | \$866.46                                                    | \$3,189.47                                                  | \$4,414.93                                                     |
| New Jersey           | \$4,198.38                                                  | \$4,337.64                                                     |                                                             |                                                             |                                                                |                                                             | \$5,070.74                                                  | \$3,691.61                                                     |
| New Mexico           | \$7,225.88                                                  | \$7,061.82                                                     |                                                             |                                                             |                                                                |                                                             | \$6,185.28                                                  | \$4,407.06                                                     |
| New York             | \$7,064.30                                                  | \$6,979.04                                                     |                                                             |                                                             |                                                                |                                                             | \$5,791.73                                                  | \$4,542.01                                                     |
| North Carolina       | \$2,285.77                                                  | \$2,259.11                                                     |                                                             |                                                             |                                                                |                                                             | \$6,150.39                                                  | \$4,374.08                                                     |
| North Dakota         | \$2,739.21                                                  | \$2,607.55                                                     |                                                             | \$789.72                                                    | \$1,284.46                                                     | \$923.50                                                    |                                                             | \$5,004.81                                                     |
| Ohio                 | \$4,524.51                                                  | \$4,473.84                                                     |                                                             | \$972.94                                                    | \$1,275.76                                                     | \$956.85                                                    | \$5,401.94                                                  | \$3,840.40                                                     |
| Oklahoma             | \$2,236.86                                                  | \$2,314.57                                                     |                                                             |                                                             |                                                                |                                                             | \$6,281.22                                                  | \$4,201.22                                                     |
| Oregon               |                                                             |                                                                |                                                             |                                                             |                                                                |                                                             | \$6,736.73                                                  | \$3,873.43                                                     |
| Pennsylvania         | \$4,499.21                                                  | \$4,465.35                                                     |                                                             | \$1,076.95                                                  | \$1,208.11                                                     | \$1,037.43                                                  | \$6,047.49                                                  | \$4,640.17                                                     |
| Rhode Island         | \$6,004.93                                                  | \$6,498.54                                                     |                                                             |                                                             |                                                                |                                                             | \$4,671.23                                                  | \$6,215.45                                                     |
| South Carolina       | \$2,218.67                                                  | \$2,293.59                                                     |                                                             | \$1,000.25                                                  | \$1,314.02                                                     | \$922.85                                                    | \$6,083.79                                                  | \$3,350.81                                                     |
| South Dakota         | \$7,184.24                                                  | \$7,177.66                                                     |                                                             | \$890.24                                                    | \$1,292.59                                                     | \$1,010.90                                                  | \$6,185.38                                                  | \$4,353.02                                                     |
| Tennessee            | \$2,300.37                                                  | \$2,367.53                                                     |                                                             | \$1,087.94                                                  | \$1,369.49                                                     | \$966.92                                                    | \$4,707.94                                                  | \$3,314.46                                                     |
| Texas                | \$2,322.32                                                  | \$2,306.65                                                     |                                                             | \$1,436.90                                                  | \$1,384.83                                                     | \$1,066.23                                                  | \$6,348.36                                                  | \$4,362.31                                                     |
| Utah                 | \$4,379.85                                                  | \$4,322.81                                                     |                                                             | \$1,365.29                                                  | \$1,376.09                                                     | \$1,115.24                                                  | \$6,793.90                                                  | \$4,100.69                                                     |
| Vermont              | \$7,239.61                                                  | \$7,134.97                                                     |                                                             |                                                             |                                                                |                                                             | \$4,845.36                                                  | \$3,690.98                                                     |
| Virginia             | \$2,305.09                                                  | \$2,387.12                                                     |                                                             | \$1,288.69                                                  | \$1,349.79                                                     | \$972.26                                                    | \$5,366.29                                                  | \$3,696.68                                                     |

|                          |            |            |            |            |            |            |            |
|--------------------------|------------|------------|------------|------------|------------|------------|------------|
| Washington               | \$7,509.85 | \$7,262.76 | \$1,224.44 | \$1,303.32 | \$951.24   | \$5,014.89 | \$5,317.00 |
| West Virginia            | \$2,727.19 | \$2,694.77 | \$898.87   | \$1,300.27 | \$1,026.33 |            | \$3,744.69 |
| Wisconsin                | \$7,058.13 | \$7,044.49 |            |            |            | \$5,260.65 | \$6,237.87 |
| Wyoming                  | \$2,678.67 | \$3,075.77 | \$1,088.37 | \$1,187.06 | \$856.46   | \$5,210.55 | \$3,604.08 |
| <b>Nation as a whole</b> | \$3,323.25 | \$3,128.75 | \$1,362.97 | \$1,324.96 | \$980.04   | \$5,812.71 | \$4,220.77 |



## Appendix Table 4: Child poverty impacts of each simulation separately and together

| State name                | SPM child poverty rate before simulation (% poor) | Percentage reduction in SPM child poverty due to TANF simulation | Percentage reduction in SPM child poverty due to EITC simulation | Percentage reduction in SPM child poverty due to SNAP simulation | Percentage reduction in SPM child poverty due to CTC simulation | Total percentage reduction in SPM child poverty due to all four simulations combined | SPM child poverty rate after all four simulations combined (% poor) |
|---------------------------|---------------------------------------------------|------------------------------------------------------------------|------------------------------------------------------------------|------------------------------------------------------------------|-----------------------------------------------------------------|--------------------------------------------------------------------------------------|---------------------------------------------------------------------|
| Iowa                      | 5.20                                              | 0.07                                                             | 0.54                                                             | 0.14                                                             | 0.07                                                            | 0.86                                                                                 | 4.34                                                                |
| Wyoming                   | 5.55                                              | 0.32                                                             | 0.42                                                             | 0.46                                                             | 0.29                                                            | 1.36                                                                                 | 4.19                                                                |
| North Dakota              | 5.64                                              | 0.49                                                             | 0.21                                                             | 0.00                                                             | 0.00                                                            | 0.75                                                                                 | 4.89                                                                |
| South Dakota              | 6.50                                              | 0.39                                                             | 0.44                                                             | 0.32                                                             | 0.00                                                            | 1.26                                                                                 | 5.23                                                                |
| Maine                     | 7.31                                              | 0.00                                                             | 0.39                                                             | 0.00                                                             | 0.10                                                            | 0.57                                                                                 | 6.74                                                                |
| New Hampshire             | 7.43                                              | 0.04                                                             | 0.75                                                             | 0.07                                                             | 0.30                                                            | 1.05                                                                                 | 6.38                                                                |
| Vermont                   | 7.56                                              | 0.50                                                             | 0.41                                                             | 0.28                                                             | 0.41                                                            | 1.49                                                                                 | 6.07                                                                |
| Minnesota                 | 7.87                                              | 0.68                                                             | 0.10                                                             | 0.39                                                             | 0.21                                                            | 0.97                                                                                 | 6.89                                                                |
| Nebraska                  | 8.05                                              | 0.19                                                             | 0.73                                                             | 0.83                                                             | 0.25                                                            | 1.47                                                                                 | 6.58                                                                |
| <b>Low poverty states</b> | 8.64                                              | 0.46                                                             | 0.56                                                             | 0.32                                                             | 0.00                                                            | 1.49                                                                                 | 7.15                                                                |
| Montana                   | 8.86                                              | 1.30                                                             | 0.54                                                             | 0.00                                                             | 0.00                                                            | 2.30                                                                                 | 6.56                                                                |
| Wisconsin                 | 8.95                                              | 1.08                                                             | 0.28                                                             | 0.23                                                             | 0.03                                                            | 2.01                                                                                 | 6.94                                                                |
| West Virginia             | 9.21                                              | 0.52                                                             | 0.68                                                             | 0.00                                                             | 0.31                                                            | 1.51                                                                                 | 7.70                                                                |
| Idaho                     | 9.34                                              | 0.24                                                             | 0.97                                                             | 0.45                                                             | 0.58                                                            | 1.61                                                                                 | 7.72                                                                |
| Utah                      | 9.44                                              | 0.45                                                             | 1.40                                                             | 0.74                                                             | 0.55                                                            | 2.74                                                                                 | 6.70                                                                |
| Ohio                      | 9.49                                              | 0.42                                                             | 0.27                                                             | 0.33                                                             | 0.16                                                            | 1.33                                                                                 | 8.16                                                                |
| Alaska                    | 9.62                                              | 0.29                                                             | 0.94                                                             | 0.35                                                             | 0.14                                                            | 1.40                                                                                 | 8.23                                                                |
| Washington                | 9.68                                              | 0.22                                                             | 1.02                                                             | 0.21                                                             | 0.43                                                            | 1.54                                                                                 | 8.15                                                                |
| Pennsylvania              | 9.95                                              | 0.73                                                             | 0.67                                                             | 0.20                                                             | 0.16                                                            | 1.74                                                                                 | 8.21                                                                |
| Kentucky                  | 10.55                                             | 0.37                                                             | 0.64                                                             | 0.00                                                             | 0.07                                                            | 0.96                                                                                 | 9.59                                                                |

|                              |       |      |      |      |       |      |       |
|------------------------------|-------|------|------|------|-------|------|-------|
| Missouri                     | 10.56 | 0.46 | 1.32 | 0.20 | 0.38  | 1.90 | 8.66  |
| Hawaii                       | 10.67 | 0.31 | 1.21 | 0.24 | 0.22  | 1.90 | 8.77  |
| Kansas                       | 10.89 | 0.72 | 0.65 | 0.71 | 0.18  | 2.63 | 8.26  |
| Oklahoma                     | 10.99 | 0.70 | 0.62 | 0.40 | 0.26  | 1.92 | 9.07  |
| Alabama                      | 11.13 | 0.43 | 0.63 | 0.01 | 0.05  | 1.65 | 9.48  |
| <b>Medium poverty states</b> | 11.25 | 0.56 | 0.89 | 0.39 | 0.00  | 1.94 | 9.31  |
| Connecticut                  | 11.30 | 0.09 | 0.41 | 0.27 | 0.56  | 1.17 | 10.12 |
| Massachusetts                | 11.37 | 0.23 | 0.48 | 0.36 | 0.45  | 1.40 | 9.97  |
| Maryland                     | 11.50 | 0.45 | 0.72 | 0.90 | 0.68  | 1.91 | 9.59  |
| Oregon                       | 11.64 | 0.00 | 2.60 | 0.99 | 0.89  | 2.82 | 8.82  |
| Virginia                     | 11.78 | 0.35 | 1.29 | 0.82 | 0.34  | 2.39 | 9.39  |
| Tennessee                    | 11.85 | 0.17 | 0.98 | 0.22 | 0.32  | 1.51 | 10.34 |
| Colorado                     | 11.96 | 0.59 | 1.15 | 0.96 | 0.26  | 3.19 | 8.76  |
| Michigan                     | 12.03 | 1.39 | 0.61 | 0.00 | 0.22  | 2.01 | 10.01 |
| Delaware                     | 12.03 | 0.57 | 1.36 | 0.44 | 0.25  | 2.40 | 9.63  |
| New Mexico                   | 12.12 | 1.37 | 0.73 | 0.26 | 0.00  | 2.17 | 9.95  |
| Rhode Island                 | 12.43 | 0.53 | 0.87 | 0.23 | 0.44  | 1.43 | 11.01 |
| South Carolina               | 12.81 | 0.36 | 0.42 | 0.26 | 0.14  | 1.37 | 11.44 |
| North Carolina               | 12.93 | 0.52 | 0.68 | 0.28 | -0.24 | 1.47 | 11.46 |
| Indiana                      | 13.01 | 0.34 | 0.70 | 0.04 | 0.24  | 1.08 | 11.93 |
| Arkansas                     | 13.89 | 0.61 | 1.20 | 0.14 | 0.40  | 1.91 | 11.98 |
| Illinois                     | 13.94 | 0.81 | 1.89 | 0.61 | 0.44  | 3.06 | 10.88 |
| New Jersey                   | 13.98 | 0.12 | 0.78 | 0.69 | 0.41  | 2.79 | 11.19 |
| <b>Nation as a whole</b>     | 14.24 | 0.44 | 1.21 | 0.60 | 0.35  | 2.46 | 11.78 |
| Mississippi                  | 14.33 | 0.64 | 1.15 | 0.00 | 0.45  | 2.23 | 12.09 |
| Louisiana                    | 14.99 | 0.55 | 1.14 | 0.00 | 0.04  | 1.64 | 13.35 |
| New York                     | 15.43 | 0.26 | 0.34 | 0.37 | 0.00  | 0.86 | 14.57 |
| Texas                        | 15.52 | 0.59 | 1.75 | 1.00 | 0.34  | 3.15 | 12.38 |
| Georgia                      | 16.21 | 0.78 | 1.23 | 0.63 | 0.55  | 3.14 | 13.06 |

|                            |       |      |      |      |      |      |       |
|----------------------------|-------|------|------|------|------|------|-------|
| <b>High poverty states</b> | 17.15 | 0.38 | 1.53 | 0.78 | 0.00 | 2.97 | 14.18 |
| Arizona                    | 18.37 | 0.00 | 2.39 | 1.72 | 0.95 | 4.09 | 14.29 |
| Florida                    | 18.77 | 0.54 | 2.10 | 0.12 | 0.42 | 3.58 | 15.19 |
| Nevada                     | 20.43 | 0.35 | 2.56 | 1.18 | 0.52 | 4.58 | 15.85 |
| California                 | 23.04 | 0.00 | 2.21 | 1.53 | 0.75 | 4.44 | 18.60 |
| District of Columbia       | 25.03 | 0.00 | 0.04 | 0.00 | 0.38 | 0.64 | 24.40 |

**Appendix Table 5: Number of children moved out of poverty in each of the simulations and all four simulations together**

| <b>State name</b>    | <b>Estimated number of children brought out of poverty in the TANF simulation</b> | <b>Estimated number of children brought out of poverty in the EITC simulation</b> | <b>Estimated number of children brought out of poverty in the SNAP simulation</b> | <b>Estimated number of children brought out of poverty in the CTC simulation</b> | <b>Total estimated number of children brought out of poverty by all four simulations together</b> |
|----------------------|-----------------------------------------------------------------------------------|-----------------------------------------------------------------------------------|-----------------------------------------------------------------------------------|----------------------------------------------------------------------------------|---------------------------------------------------------------------------------------------------|
| Alabama              | 14,982                                                                            | 21,767                                                                            | 261                                                                               | 1,856                                                                            | 56,900                                                                                            |
| Alaska               | 1,623                                                                             | 5,330                                                                             | 1,973                                                                             | 791                                                                              | 7,933                                                                                             |
| Arizona              | 0                                                                                 | 120,582                                                                           | 86,931                                                                            | 48,233                                                                           | 206,473                                                                                           |
| Arkansas             | 12,890                                                                            | 25,598                                                                            | 2,983                                                                             | 8,453                                                                            | 40,590                                                                                            |
| California           | 0                                                                                 | 620,921                                                                           | 430,678                                                                           | 209,897                                                                          | 1,250,220                                                                                         |
| Colorado             | 22,458                                                                            | 43,466                                                                            | 36,098                                                                            | 9,780                                                                            | 120,548                                                                                           |
| Connecticut          | 2,302                                                                             | 9,859                                                                             | 6,437                                                                             | 13,497                                                                           | 28,443                                                                                            |
| Delaware             | 3,581                                                                             | 8,484                                                                             | 2,725                                                                             | 1,571                                                                            | 15,017                                                                                            |
| District of Columbia | 0                                                                                 | 143                                                                               | 0                                                                                 | 1,288                                                                            | 2,143                                                                                             |
| Florida              | 64,575                                                                            | 253,578                                                                           | 14,617                                                                            | 50,125                                                                           | 431,448                                                                                           |
| Georgia              | 59,866                                                                            | 94,057                                                                            | 48,489                                                                            | 42,285                                                                           | 240,127                                                                                           |
| Hawaii               | 2,840                                                                             | 11,122                                                                            | 2,212                                                                             | 2,050                                                                            | 17,397                                                                                            |
| Idaho                | 3,018                                                                             | 12,415                                                                            | 5,801                                                                             | 7,362                                                                            | 20,607                                                                                            |
| Illinois             | 74,830                                                                            | 174,423                                                                           | 56,221                                                                            | 40,742                                                                           | 283,101                                                                                           |
| Indiana              | 16,566                                                                            | 33,719                                                                            | 2,077                                                                             | 11,589                                                                           | 51,732                                                                                            |
| Iowa                 | 1,551                                                                             | 11,808                                                                            | 3,081                                                                             | 1,427                                                                            | 18,718                                                                                            |
| Kansas               | 15,436                                                                            | 13,961                                                                            | 15,357                                                                            | 3,834                                                                            | 56,523                                                                                            |
| Kentucky             | 11,206                                                                            | 19,292                                                                            | 0                                                                                 | 2,044                                                                            | 29,118                                                                                            |
| Louisiana            | 18,785                                                                            | 39,268                                                                            | 170                                                                               | 1,309                                                                            | 56,155                                                                                            |
| Maine                | 0                                                                                 | 3,115                                                                             | 0                                                                                 | 763                                                                              | 4,512                                                                                             |

|                |         |         |         |        |         |
|----------------|---------|---------|---------|--------|---------|
| Maryland       | 18,073  | 28,986  | 36,559  | 27,620 | 77,385  |
| Massachusetts  | 9,657   | 20,621  | 15,630  | 19,222 | 60,134  |
| Michigan       | 95,264  | 41,861  | 0       | 15,320 | 138,077 |
| Minnesota      | 26,236  | 3,759   | 15,114  | 8,118  | 37,418  |
| Mississippi    | 14,624  | 26,393  | 0       | 10,364 | 51,187  |
| Missouri       | 19,304  | 55,547  | 8,291   | 16,159 | 80,114  |
| Montana        | 8,566   | 3,554   | 0       | 0      | 15,153  |
| Nebraska       | 2,627   | 10,022  | 11,407  | 3,423  | 20,206  |
| Nevada         | 6,931   | 51,294  | 23,763  | 10,433 | 91,794  |
| New Hampshire  | 329     | 6,248   | 540     | 2,467  | 8,716   |
| New Jersey     | 7,100   | 47,941  | 42,098  | 25,270 | 170,607 |
| New Mexico     | 21,101  | 11,261  | 4,020   | 0      | 33,516  |
| New York       | 33,385  | 44,292  | 47,517  | 0      | 110,974 |
| North Carolina | 36,568  | 47,615  | 19,757  | 7,891  | 114,001 |
| North Dakota   | 2,242   | 970     | 0       | 0      | 3,454   |
| Ohio           | 33,234  | 21,735  | 26,053  | 12,844 | 106,278 |
| Oklahoma       | 19,655  | 17,582  | 11,244  | 7,337  | 54,265  |
| Oregon         | 0       | 67,012  | 25,462  | 23,046 | 72,810  |
| Pennsylvania   | 60,047  | 54,603  | 16,733  | 12,780 | 142,793 |
| Rhode Island   | 3,593   | 5,844   | 1,548   | 2,952  | 9,599   |
| South Carolina | 11,714  | 13,566  | 8,510   | 4,635  | 44,088  |
| South Dakota   | 2,314   | 2,665   | 1,940   | 0      | 7,568   |
| Tennessee      | 7,398   | 43,657  | 9,699   | 14,415 | 67,151  |
| Texas          | 124,214 | 367,294 | 209,962 | 70,981 | 662,460 |
| Utah           | 12,149  | 37,498  | 19,859  | 14,850 | 73,402  |
| Vermont        | 1,817   | 1,476   | 1,018   | 1,497  | 5,413   |
| Virginia       | 19,945  | 73,164  | 46,503  | 19,026 | 135,314 |
| Washington     | 10,875  | 49,261  | 10,288  | 20,868 | 74,453  |
| West Virginia  | 6,134   | 8,049   | 0       | 3,705  | 17,765  |

|                          |                |                  |                  |                |                  |
|--------------------------|----------------|------------------|------------------|----------------|------------------|
| Wisconsin                | 42,845         | 11,212           | 8,988            | 1,233          | 79,893           |
| Wyoming                  | 1,326          | 1,731            | 1,883            | 1,204          | 5,558            |
| <b>Nation as a whole</b> | <b>985,776</b> | <b>2,699,624</b> | <b>1,340,499</b> | <b>816,558</b> | <b>5,509,251</b> |

## Appendix Table 6: Increase in resources to needs in the TANF simulation

| State name           | Percent increase in resources to needs <100% PL due to TANF simulation |                                                           |                                                                            | Percent increase in resources to needs 100-200% PL before TANF simulation |                                                              |                                                                               | Percent increase in resources to needs >200% PL due to TANF simulation |                                                           |                                                                            |
|----------------------|------------------------------------------------------------------------|-----------------------------------------------------------|----------------------------------------------------------------------------|---------------------------------------------------------------------------|--------------------------------------------------------------|-------------------------------------------------------------------------------|------------------------------------------------------------------------|-----------------------------------------------------------|----------------------------------------------------------------------------|
|                      | Average resources to needs <100% PL before TANF simulation             | Average resources to needs <100% PL after TANF simulation | Percent increase in resources to needs <100% PL due to TANF simulation (%) | Average resources to needs 100-200% PL before TANF simulation             | Average resources to needs 100-200% PL after TANF simulation | Percent increase in resources to needs 100-200% PL due to TANF simulation (%) | Average resources to needs >200% PL before TANF simulation             | Average resources to needs >200% PL after TANF simulation | Percent increase in resources to needs >200% PL due to TANF simulation (%) |
| Alabama              | 0.66                                                                   | 0.70                                                      | 5.14                                                                       | 1.44                                                                      | 1.44                                                         | 0.38                                                                          | 4.94                                                                   | 4.94                                                      | 0.00                                                                       |
| Alaska               | 0.60                                                                   | 0.64                                                      | 6.58                                                                       | 1.49                                                                      | 1.49                                                         | 0.04                                                                          | 3.97                                                                   | 3.97                                                      | 0.00                                                                       |
| Arizona              | 0.68                                                                   | 0.70                                                      | 2.82                                                                       | 1.43                                                                      | 1.44                                                         | 0.06                                                                          | 3.85                                                                   | 3.85                                                      | 0.00                                                                       |
| Arkansas             | 0.72                                                                   | 0.74                                                      | 3.14                                                                       | 1.47                                                                      | 1.47                                                         | 0.15                                                                          | 4.07                                                                   | 4.07                                                      | 0.00                                                                       |
| California           | 0.71                                                                   | 0.71                                                      | 0.00                                                                       | 1.39                                                                      | 1.39                                                         | 0.00                                                                          | 4.45                                                                   | 4.45                                                      | 0.00                                                                       |
| Colorado             | 0.72                                                                   | 0.74                                                      | 3.47                                                                       | 1.44                                                                      | 1.44                                                         | 0.21                                                                          | 4.81                                                                   | 4.81                                                      | 0.00                                                                       |
| Connecticut          | 0.70                                                                   | 0.72                                                      | 2.84                                                                       | 1.47                                                                      | 1.47                                                         | 0.17                                                                          | 5.59                                                                   | 5.59                                                      | 0.00                                                                       |
| Delaware             | 0.74                                                                   | 0.76                                                      | 3.25                                                                       | 1.42                                                                      | 1.42                                                         | 0.18                                                                          | 3.54                                                                   | 3.54                                                      | 0.00                                                                       |
| District of Columbia | 0.74                                                                   | 0.74                                                      | 0.17                                                                       | 1.34                                                                      | 1.34                                                         | 0.00                                                                          | 5.28                                                                   | 5.28                                                      | 0.00                                                                       |
| Florida              | 0.69                                                                   | 0.71                                                      | 2.46                                                                       | 1.43                                                                      | 1.43                                                         | 0.09                                                                          | 5.10                                                                   | 5.10                                                      | 0.00                                                                       |
| Georgia              | 0.73                                                                   | 0.75                                                      | 2.83                                                                       | 1.45                                                                      | 1.45                                                         | 0.20                                                                          | 4.60                                                                   | 4.60                                                      | 0.00                                                                       |
| Hawaii               | 0.78                                                                   | 0.78                                                      | 1.14                                                                       | 1.42                                                                      | 1.42                                                         | 0.09                                                                          | 3.88                                                                   | 3.88                                                      | 0.00                                                                       |
| Idaho                | 0.68                                                                   | 0.70                                                      | 2.81                                                                       | 1.49                                                                      | 1.49                                                         | 0.12                                                                          | 4.30                                                                   | 4.30                                                      | 0.00                                                                       |
| Illinois             | 0.70                                                                   | 0.73                                                      | 4.08                                                                       | 1.42                                                                      | 1.43                                                         | 0.25                                                                          | 5.74                                                                   | 5.74                                                      | 0.00                                                                       |
| Indiana              | 0.71                                                                   | 0.73                                                      | 2.67                                                                       | 1.48                                                                      | 1.48                                                         | 0.19                                                                          | 4.26                                                                   | 4.26                                                      | 0.00                                                                       |
| Iowa                 | 0.64                                                                   | 0.65                                                      | 1.04                                                                       | 1.50                                                                      | 1.50                                                         | 0.03                                                                          | 3.82                                                                   | 3.82                                                      | 0.00                                                                       |
| Kansas               | 0.42                                                                   | 0.46                                                      | 9.30                                                                       | 1.49                                                                      | 1.49                                                         | 0.25                                                                          | 4.18                                                                   | 4.18                                                      | 0.00                                                                       |
| Kentucky             | 0.67                                                                   | 0.69                                                      | 3.33                                                                       | 1.50                                                                      | 1.51                                                         | 0.24                                                                          | 3.92                                                                   | 3.92                                                      | 0.00                                                                       |

|                |      |      |       |      |      |      |      |      |      |
|----------------|------|------|-------|------|------|------|------|------|------|
| Louisiana      | 0.67 | 0.70 | 3.57  | 1.45 | 1.46 | 0.62 | 4.80 | 4.80 | 0.00 |
| Maine          | 0.75 | 0.75 | 0.00  | 1.51 | 1.51 | 0.00 | 4.38 | 4.38 | 0.00 |
| Maryland       | 0.72 | 0.74 | 3.26  | 1.47 | 1.47 | 0.20 | 4.33 | 4.33 | 0.00 |
| Massachusetts  | 0.69 | 0.71 | 2.32  | 1.44 | 1.44 | 0.05 | 4.44 | 4.44 | 0.00 |
| Michigan       | 0.72 | 0.77 | 7.92  | 1.51 | 1.52 | 0.25 | 4.27 | 4.27 | 0.00 |
| Minnesota      | 0.70 | 0.72 | 3.23  | 1.50 | 1.50 | 0.14 | 4.64 | 4.64 | 0.00 |
| Mississippi    | 0.75 | 0.77 | 2.52  | 1.47 | 1.47 | 0.33 | 4.29 | 4.29 | 0.00 |
| Missouri       | 0.71 | 0.72 | 0.82  | 1.46 | 1.46 | 0.12 | 5.22 | 5.22 | 0.00 |
| Montana        | 0.70 | 0.74 | 6.55  | 1.52 | 1.53 | 0.22 | 4.66 | 4.66 | 0.00 |
| Nebraska       | 0.70 | 0.73 | 3.92  | 1.52 | 1.52 | 0.15 | 4.52 | 4.52 | 0.00 |
| Nevada         | 0.63 | 0.66 | 4.05  | 1.41 | 1.41 | 0.00 | 4.15 | 4.15 | 0.00 |
| New Hampshire  | 0.69 | 0.71 | 2.50  | 1.52 | 1.52 | 0.00 | 4.45 | 4.45 | 0.00 |
| New Jersey     | 0.69 | 0.71 | 2.59  | 1.41 | 1.41 | 0.06 | 4.75 | 4.75 | 0.00 |
| New Mexico     | 0.69 | 0.74 | 6.77  | 1.51 | 1.51 | 0.50 | 5.71 | 5.71 | 0.00 |
| New York       | 0.70 | 0.72 | 2.47  | 1.43 | 1.43 | 0.12 | 4.68 | 4.68 | 0.00 |
| North Carolina | 0.71 | 0.73 | 3.66  | 1.47 | 1.47 | 0.24 | 4.69 | 4.69 | 0.00 |
| North Dakota   | 0.56 | 0.60 | 7.32  | 1.59 | 1.60 | 0.16 | 4.96 | 4.96 | 0.00 |
| Ohio           | 0.69 | 0.72 | 3.75  | 1.49 | 1.49 | 0.34 | 4.22 | 4.22 | 0.00 |
| Oklahoma       | 0.69 | 0.72 | 4.15  | 1.50 | 1.50 | 0.21 | 4.38 | 4.38 | 0.00 |
| Oregon         | 0.57 | 0.57 | 0.00  | 1.44 | 1.44 | 0.00 | 4.00 | 4.00 | 0.00 |
| Pennsylvania   | 0.70 | 0.72 | 2.55  | 1.51 | 1.51 | 0.13 | 4.75 | 4.75 | 0.00 |
| Rhode Island   | 0.73 | 0.77 | 4.86  | 1.43 | 1.43 | 0.29 | 4.19 | 4.19 | 0.00 |
| South Carolina | 0.61 | 0.63 | 3.49  | 1.48 | 1.49 | 0.19 | 3.84 | 3.84 | 0.00 |
| South Dakota   | 0.25 | 0.33 | 31.97 | 1.55 | 1.55 | 0.50 | 4.71 | 4.71 | 0.00 |
| Tennessee      | 0.71 | 0.73 | 2.12  | 1.48 | 1.48 | 0.13 | 4.23 | 4.23 | 0.00 |
| Texas          | 0.70 | 0.72 | 2.78  | 1.44 | 1.44 | 0.26 | 4.56 | 4.56 | 0.00 |
| Utah           | 0.71 | 0.74 | 3.96  | 1.50 | 1.50 | 0.18 | 3.96 | 3.96 | 0.00 |
| Vermont        | 0.76 | 0.78 | 3.02  | 1.49 | 1.49 | 0.18 | 3.84 | 3.84 | 0.00 |
| Virginia       | 0.61 | 0.62 | 1.68  | 1.48 | 1.48 | 0.09 | 4.54 | 4.54 | 0.00 |



|                          |      |      |       |      |      |      |      |      |      |
|--------------------------|------|------|-------|------|------|------|------|------|------|
| Washington               | 0.74 | 0.75 | 1.35  | 1.49 | 1.49 | 0.03 | 4.24 | 4.24 | 0.00 |
| West Virginia            | 0.64 | 0.68 | 7.22  | 1.54 | 1.54 | 0.14 | 4.56 | 4.56 | 0.00 |
| Wisconsin                | 0.71 | 0.76 | 6.87  | 1.51 | 1.52 | 0.26 | 4.50 | 4.50 | 0.00 |
| Wyoming                  | 0.35 | 0.39 | 10.62 | 1.56 | 1.56 | 0.12 | 4.04 | 4.04 | 0.00 |
| <b>Nation as a whole</b> | 0.69 | 0.71 | 2.60  | 1.46 | 1.46 | 0.16 | 4.53 | 4.53 | 0.00 |

## Appendix Table 7: Increase in resources to needs in the Food Stamps simulation

| State name           | Average resources to needs <100% PL before SNAP simulation |                                                           |                                                            | Percent increase in resources to needs 100-200% PL before SNAP simulation |                                                              | Percent increase in resources to needs <100-200% PL due to SNAP simulation |                                                                | Percent increase in resources to needs >200% PL after SNAP simulation |      | Percent increase in resources to needs >200% PL due to SNAP simulation |
|----------------------|------------------------------------------------------------|-----------------------------------------------------------|------------------------------------------------------------|---------------------------------------------------------------------------|--------------------------------------------------------------|----------------------------------------------------------------------------|----------------------------------------------------------------|-----------------------------------------------------------------------|------|------------------------------------------------------------------------|
|                      | Average resources to needs <100% PL before SNAP simulation | Average resources to needs <100% PL after SNAP simulation | Average resources to needs <100% PL due to SNAP simulation | Average resources to needs 100-200% PL before SNAP simulation             | Average resources to needs 100-200% PL after SNAP simulation | Average resources to needs <100-200% PL due to SNAP simulation             | Average resources to needs <100-200% PL before SNAP simulation | Average resources to needs >200% PL after SNAP simulation             |      |                                                                        |
| Alabama              | 0.66                                                       | 0.69                                                      | 3.25                                                       | 1.44                                                                      | 1.45                                                         | 1.06                                                                       | 4.94                                                           | 4.94                                                                  | 0.00 |                                                                        |
| Alaska               | 0.60                                                       | 0.66                                                      | 9.12                                                       | 1.49                                                                      | 1.51                                                         | 1.36                                                                       | 3.97                                                           | 3.97                                                                  | 0.00 |                                                                        |
| Arizona              | 0.68                                                       | 0.74                                                      | 9.25                                                       | 1.43                                                                      | 1.45                                                         | 1.21                                                                       | 3.85                                                           | 3.85                                                                  | 0.00 |                                                                        |
| Arkansas             | 0.72                                                       | 0.73                                                      | 1.79                                                       | 1.47                                                                      | 1.48                                                         | 1.00                                                                       | 4.07                                                           | 4.07                                                                  | 0.02 |                                                                        |
| California           | 0.71                                                       | 0.75                                                      | 6.16                                                       | 1.39                                                                      | 1.40                                                         | 0.71                                                                       | 4.45                                                           | 4.45                                                                  | 0.00 |                                                                        |
| Colorado             | 0.72                                                       | 0.76                                                      | 5.62                                                       | 1.44                                                                      | 1.45                                                         | 0.92                                                                       | 4.81                                                           | 4.81                                                                  | 0.00 |                                                                        |
| Connecticut          | 0.70                                                       | 0.72                                                      | 2.74                                                       | 1.47                                                                      | 1.47                                                         | 0.23                                                                       | 5.59                                                           | 5.59                                                                  | 0.00 |                                                                        |
| Delaware             | 0.74                                                       | 0.77                                                      | 3.95                                                       | 1.42                                                                      | 1.42                                                         | 0.19                                                                       | 3.54                                                           | 3.54                                                                  | 0.00 |                                                                        |
| District of Columbia | 0.74                                                       | 0.74                                                      | 0.00                                                       | 1.34                                                                      | 1.34                                                         | 0.00                                                                       | 5.28                                                           | 5.28                                                                  | 0.00 |                                                                        |
| Florida              | 0.69                                                       | 0.70                                                      | 1.61                                                       | 1.43                                                                      | 1.44                                                         | 0.13                                                                       | 5.10                                                           | 5.10                                                                  | 0.00 |                                                                        |
| Georgia              | 0.73                                                       | 0.75                                                      | 3.19                                                       | 1.45                                                                      | 1.46                                                         | 1.18                                                                       | 4.60                                                           | 4.60                                                                  | 0.00 |                                                                        |
| Hawaii               | 0.78                                                       | 0.80                                                      | 2.60                                                       | 1.42                                                                      | 1.43                                                         | 0.32                                                                       | 3.88                                                           | 3.88                                                                  | 0.00 |                                                                        |
| Idaho                | 0.68                                                       | 0.72                                                      | 5.33                                                       | 1.49                                                                      | 1.51                                                         | 1.37                                                                       | 4.30                                                           | 4.30                                                                  | 0.01 |                                                                        |
| Illinois             | 0.70                                                       | 0.72                                                      | 2.03                                                       | 1.42                                                                      | 1.43                                                         | 0.54                                                                       | 5.74                                                           | 5.74                                                                  | 0.00 |                                                                        |
| Indiana              | 0.71                                                       | 0.72                                                      | 1.32                                                       | 1.48                                                                      | 1.49                                                         | 0.89                                                                       | 4.26                                                           | 4.26                                                                  | 0.00 |                                                                        |
| Iowa                 | 0.64                                                       | 0.68                                                      | 5.97                                                       | 1.50                                                                      | 1.51                                                         | 0.61                                                                       | 3.82                                                           | 3.82                                                                  | 0.00 |                                                                        |
| Kansas               | 0.42                                                       | 0.45                                                      | 8.07                                                       | 1.49                                                                      | 1.50                                                         | 0.98                                                                       | 4.18                                                           | 4.18                                                                  | 0.00 |                                                                        |
| Kentucky             | 0.67                                                       | 0.67                                                      | 0.66                                                       | 1.50                                                                      | 1.51                                                         | 0.24                                                                       | 3.92                                                           | 3.92                                                                  | 0.00 |                                                                        |

|                |      |      |       |      |      |      |      |      |      |
|----------------|------|------|-------|------|------|------|------|------|------|
| Louisiana      | 0.67 | 0.68 | 1.24  | 1.45 | 1.46 | 0.87 | 4.80 | 4.80 | 0.00 |
| Maine          | 0.75 | 0.75 | 0.00  | 1.51 | 1.51 | 0.00 | 4.38 | 4.38 | 0.00 |
| Maryland       | 0.72 | 0.73 | 2.29  | 1.47 | 1.47 | 0.28 | 4.33 | 4.33 | 0.00 |
| Massachusetts  | 0.69 | 0.72 | 4.00  | 1.44 | 1.45 | 0.27 | 4.44 | 4.44 | 0.00 |
| Michigan       | 0.72 | 0.72 | 0.34  | 1.51 | 1.52 | 0.22 | 4.27 | 4.27 | 0.00 |
| Minnesota      | 0.70 | 0.73 | 4.36  | 1.50 | 1.50 | 0.35 | 4.64 | 4.64 | 0.00 |
| Mississippi    | 0.75 | 0.75 | 0.00  | 1.47 | 1.47 | 0.42 | 4.29 | 4.29 | 0.00 |
| Missouri       | 0.71 | 0.73 | 2.38  | 1.46 | 1.47 | 0.90 | 5.22 | 5.22 | 0.00 |
| Montana        | 0.70 | 0.70 | 0.00  | 1.52 | 1.54 | 0.87 | 4.66 | 4.66 | 0.00 |
| Nebraska       | 0.70 | 0.77 | 9.43  | 1.52 | 1.55 | 1.57 | 4.52 | 4.52 | 0.00 |
| Nevada         | 0.63 | 0.67 | 6.25  | 1.41 | 1.42 | 0.88 | 4.15 | 4.15 | 0.00 |
| New Hampshire  | 0.69 | 0.70 | 1.39  | 1.52 | 1.52 | 0.16 | 4.45 | 4.45 | 0.00 |
| New Jersey     | 0.69 | 0.72 | 4.35  | 1.41 | 1.41 | 0.22 | 4.75 | 4.75 | 0.00 |
| New Mexico     | 0.69 | 0.70 | 1.71  | 1.51 | 1.52 | 0.71 | 5.71 | 5.71 | 0.00 |
| New York       | 0.70 | 0.72 | 2.80  | 1.43 | 1.44 | 0.53 | 4.68 | 4.68 | 0.00 |
| North Carolina | 0.71 | 0.74 | 3.93  | 1.47 | 1.48 | 0.63 | 4.69 | 4.69 | 0.00 |
| North Dakota   | 0.56 | 0.56 | 0.00  | 1.59 | 1.60 | 0.34 | 4.96 | 4.96 | 0.00 |
| Ohio           | 0.69 | 0.70 | 2.04  | 1.49 | 1.49 | 0.56 | 4.22 | 4.22 | 0.00 |
| Oklahoma       | 0.69 | 0.72 | 4.39  | 1.50 | 1.52 | 1.30 | 4.38 | 4.38 | 0.00 |
| Oregon         | 0.57 | 0.60 | 4.62  | 1.44 | 1.45 | 0.36 | 4.00 | 4.00 | 0.00 |
| Pennsylvania   | 0.70 | 0.72 | 1.96  | 1.51 | 1.52 | 0.39 | 4.75 | 4.75 | 0.00 |
| Rhode Island   | 0.73 | 0.75 | 2.43  | 1.43 | 1.43 | 0.24 | 4.19 | 4.19 | 0.00 |
| South Carolina | 0.61 | 0.65 | 6.67  | 1.48 | 1.50 | 0.97 | 3.84 | 3.84 | 0.00 |
| South Dakota   | 0.25 | 0.28 | 10.87 | 1.55 | 1.56 | 0.83 | 4.71 | 4.71 | 0.00 |
| Tennessee      | 0.71 | 0.72 | 1.41  | 1.48 | 1.49 | 1.07 | 4.23 | 4.23 | 0.00 |
| Texas          | 0.70 | 0.74 | 5.28  | 1.44 | 1.46 | 1.31 | 4.56 | 4.56 | 0.00 |
| Utah           | 0.71 | 0.76 | 6.98  | 1.50 | 1.52 | 1.51 | 3.96 | 3.96 | 0.00 |
| Vermont        | 0.76 | 0.77 | 1.00  | 1.49 | 1.49 | 0.10 | 3.84 | 3.84 | 0.00 |
| Virginia       | 0.61 | 0.64 | 4.26  | 1.48 | 1.48 | 0.57 | 4.54 | 4.54 | 0.00 |

|                          |      |      |       |      |      |      |      |      |      |
|--------------------------|------|------|-------|------|------|------|------|------|------|
| Washington               | 0.74 | 0.75 | 1.04  | 1.49 | 1.50 | 0.49 | 4.24 | 4.24 | 0.00 |
| West Virginia            | 0.64 | 0.64 | 0.00  | 1.54 | 1.55 | 0.72 | 4.56 | 4.56 | 0.00 |
| Wisconsin                | 0.71 | 0.72 | 1.72  | 1.51 | 1.52 | 0.17 | 4.50 | 4.50 | 0.00 |
| Wyoming                  | 0.35 | 0.41 | 15.14 | 1.56 | 1.58 | 1.10 | 4.04 | 4.04 | 0.01 |
| <b>Nation as a whole</b> | 0.69 | 0.72 | 4.12  | 1.46 | 1.47 | 0.70 | 4.53 | 4.53 | 0.00 |

## Appendix Table 8: Increase in resources to needs in the EITC simulation

| State name           | Average                                            | Average                                           | Percent                                                        | Average                                               | Average                                              | Percent                                                            | Average                                            | Average                                           | Percent                                                        |
|----------------------|----------------------------------------------------|---------------------------------------------------|----------------------------------------------------------------|-------------------------------------------------------|------------------------------------------------------|--------------------------------------------------------------------|----------------------------------------------------|---------------------------------------------------|----------------------------------------------------------------|
|                      | resources to needs <100% PL before EITC simulation | resources to needs <100% PL after EITC simulation | increase in resources to needs <100% PL due to EITC simulation | resources to needs 100-200% PL before EITC simulation | resources to needs 100-200% PL after EITC simulation | increase in resources to needs <100-200% PL due to EITC simulation | resources to needs >200% PL before EITC simulation | resources to needs >200% PL after EITC simulation | increase in resources to needs >200% PL due to EITC simulation |
| Alabama              | 0.66                                               | 0.69                                              | 3.10                                                           | 1.44                                                  | 1.49                                                 | 3.62                                                               | 4.94                                               | 4.95                                              | 0.09                                                           |
| Alaska               | 0.60                                               | 0.62                                              | 3.56                                                           | 1.49                                                  | 1.52                                                 | 1.62                                                               | 3.97                                               | 3.98                                              | 0.05                                                           |
| Arizona              | 0.68                                               | 0.71                                              | 5.58                                                           | 1.43                                                  | 1.47                                                 | 2.53                                                               | 3.85                                               | 3.86                                              | 0.08                                                           |
| Arkansas             | 0.72                                               | 0.75                                              | 3.82                                                           | 1.47                                                  | 1.52                                                 | 3.50                                                               | 4.07                                               | 4.07                                              | 0.12                                                           |
| California           | 0.71                                               | 0.74                                              | 4.78                                                           | 1.39                                                  | 1.41                                                 | 1.69                                                               | 4.45                                               | 4.45                                              | 0.04                                                           |
| Colorado             | 0.72                                               | 0.76                                              | 5.77                                                           | 1.44                                                  | 1.47                                                 | 2.33                                                               | 4.81                                               | 4.81                                              | 0.03                                                           |
| Connecticut          | 0.70                                               | 0.70                                              | 1.15                                                           | 1.47                                                  | 1.47                                                 | 0.39                                                               | 5.59                                               | 5.59                                              | 0.01                                                           |
| Delaware             | 0.74                                               | 0.77                                              | 4.54                                                           | 1.42                                                  | 1.45                                                 | 2.36                                                               | 3.54                                               | 3.54                                              | 0.09                                                           |
| District of Columbia | 0.74                                               | 0.74                                              | 0.14                                                           | 1.34                                                  | 1.35                                                 | 0.13                                                               | 5.28                                               | 5.28                                              | 0.00                                                           |
| Florida              | 0.69                                               | 0.72                                              | 4.81                                                           | 1.43                                                  | 1.46                                                 | 2.06                                                               | 5.10                                               | 5.10                                              | 0.04                                                           |
| Georgia              | 0.73                                               | 0.76                                              | 4.51                                                           | 1.45                                                  | 1.49                                                 | 2.75                                                               | 4.60                                               | 4.61                                              | 0.09                                                           |
| Hawaii               | 0.78                                               | 0.80                                              | 3.26                                                           | 1.42                                                  | 1.44                                                 | 1.57                                                               | 3.88                                               | 3.89                                              | 0.05                                                           |
| Idaho                | 0.68                                               | 0.71                                              | 4.86                                                           | 1.49                                                  | 1.53                                                 | 3.21                                                               | 4.30                                               | 4.30                                              | 0.10                                                           |
| Illinois             | 0.70                                               | 0.73                                              | 4.26                                                           | 1.42                                                  | 1.46                                                 | 2.32                                                               | 5.74                                               | 5.74                                              | 0.04                                                           |
| Indiana              | 0.71                                               | 0.73                                              | 2.60                                                           | 1.48                                                  | 1.51                                                 | 2.24                                                               | 4.26                                               | 4.26                                              | 0.09                                                           |
| Iowa                 | 0.64                                               | 0.67                                              | 3.89                                                           | 1.50                                                  | 1.53                                                 | 2.20                                                               | 3.82                                               | 3.82                                              | 0.13                                                           |
| Kansas               | 0.42                                               | 0.44                                              | 3.96                                                           | 1.49                                                  | 1.52                                                 | 1.78                                                               | 4.18                                               | 4.19                                              | 0.07                                                           |
| Kentucky             | 0.67                                               | 0.68                                              | 2.62                                                           | 1.50                                                  | 1.56                                                 | 3.44                                                               | 3.92                                               | 3.92                                              | 0.14                                                           |
| Louisiana            | 0.67                                               | 0.70                                              | 3.44                                                           | 1.45                                                  | 1.49                                                 | 2.95                                                               | 4.80                                               | 4.80                                              | 0.10                                                           |
| Maine                | 0.75                                               | 0.77                                              | 2.49                                                           | 1.51                                                  | 1.55                                                 | 2.08                                                               | 4.38                                               | 4.38                                              | 0.08                                                           |

|                |      |      |      |      |      |      |      |      |      |
|----------------|------|------|------|------|------|------|------|------|------|
| Maryland       | 0.72 | 0.73 | 1.76 | 1.47 | 1.47 | 0.65 | 4.33 | 4.33 | 0.02 |
| Massachusetts  | 0.69 | 0.70 | 2.12 | 1.44 | 1.46 | 0.90 | 4.44 | 4.44 | 0.02 |
| Michigan       | 0.72 | 0.73 | 2.26 | 1.51 | 1.54 | 1.93 | 4.27 | 4.27 | 0.06 |
| Minnesota      | 0.70 | 0.71 | 0.96 | 1.50 | 1.50 | 0.49 | 4.64 | 4.64 | 0.01 |
| Mississippi    | 0.75 | 0.77 | 2.82 | 1.47 | 1.51 | 2.98 | 4.29 | 4.30 | 0.20 |
| Missouri       | 0.71 | 0.74 | 3.60 | 1.46 | 1.50 | 2.86 | 5.22 | 5.22 | 0.05 |
| Montana        | 0.70 | 0.72 | 3.66 | 1.52 | 1.56 | 2.59 | 4.66 | 4.67 | 0.13 |
| Nebraska       | 0.70 | 0.73 | 4.21 | 1.52 | 1.55 | 1.95 | 4.52 | 4.53 | 0.07 |
| Nevada         | 0.63 | 0.67 | 6.23 | 1.41 | 1.44 | 2.08 | 4.15 | 4.16 | 0.08 |
| New Hampshire  | 0.69 | 0.72 | 3.65 | 1.52 | 1.54 | 1.27 | 4.45 | 4.45 | 0.05 |
| New Jersey     | 0.69 | 0.71 | 2.30 | 1.41 | 1.42 | 0.79 | 4.75 | 4.75 | 0.02 |
| New Mexico     | 0.69 | 0.71 | 1.94 | 1.51 | 1.54 | 2.52 | 5.71 | 5.72 | 0.13 |
| New York       | 0.70 | 0.71 | 1.12 | 1.43 | 1.44 | 0.61 | 4.68 | 4.68 | 0.02 |
| North Carolina | 0.71 | 0.74 | 4.00 | 1.47 | 1.50 | 2.49 | 4.69 | 4.69 | 0.08 |
| North Dakota   | 0.56 | 0.58 | 3.45 | 1.59 | 1.64 | 2.95 | 4.96 | 4.97 | 0.08 |
| Ohio           | 0.69 | 0.71 | 3.23 | 1.49 | 1.53 | 2.76 | 4.22 | 4.22 | 0.08 |
| Oklahoma       | 0.69 | 0.72 | 3.31 | 1.50 | 1.54 | 2.85 | 4.38 | 4.39 | 0.13 |
| Oregon         | 0.57 | 0.60 | 5.76 | 1.44 | 1.47 | 2.28 | 4.00 | 4.00 | 0.07 |
| Pennsylvania   | 0.70 | 0.73 | 3.42 | 1.51 | 1.54 | 2.15 | 4.75 | 4.75 | 0.07 |
| Rhode Island   | 0.73 | 0.74 | 1.15 | 1.43 | 1.44 | 1.02 | 4.19 | 4.19 | 0.02 |
| South Carolina | 0.61 | 0.63 | 3.47 | 1.48 | 1.53 | 2.97 | 3.84 | 3.84 | 0.12 |
| South Dakota   | 0.25 | 0.27 | 7.89 | 1.55 | 1.59 | 2.68 | 4.71 | 4.72 | 0.12 |
| Tennessee      | 0.71 | 0.75 | 4.35 | 1.48 | 1.52 | 3.16 | 4.23 | 4.24 | 0.11 |
| Texas          | 0.70 | 0.74 | 5.52 | 1.44 | 1.48 | 3.06 | 4.56 | 4.57 | 0.10 |
| Utah           | 0.71 | 0.75 | 6.15 | 1.50 | 1.53 | 2.39 | 3.96 | 3.96 | 0.10 |
| Vermont        | 0.76 | 0.76 | 0.81 | 1.49 | 1.50 | 0.51 | 3.84 | 3.84 | 0.03 |
| Virginia       | 0.61 | 0.64 | 4.59 | 1.48 | 1.50 | 1.90 | 4.54 | 4.54 | 0.04 |
| Washington     | 0.74 | 0.77 | 4.42 | 1.49 | 1.52 | 2.25 | 4.24 | 4.25 | 0.08 |
| West Virginia  | 0.64 | 0.66 | 3.03 | 1.54 | 1.58 | 2.90 | 4.56 | 4.56 | 0.14 |

|                          |      |      |      |      |      |      |      |      |      |
|--------------------------|------|------|------|------|------|------|------|------|------|
| Wisconsin                | 0.71 | 0.72 | 2.04 | 1.51 | 1.53 | 1.06 | 4.50 | 4.51 | 0.05 |
| Wyoming                  | 0.35 | 0.38 | 8.74 | 1.56 | 1.60 | 2.16 | 4.04 | 4.04 | 0.10 |
| <b>Nation as a whole</b> | 0.69 | 0.72 | 3.98 | 1.46 | 1.49 | 2.07 | 4.53 | 4.53 | 0.06 |

## Appendix Table 9: Increase in resources to needs in the CTC simulation

| State name           | Average resources to needs <100% PL before CTC simulation | Average resources to needs <100% PL after CTC simulation | Percent increase in resources to needs <100% PL due to CTC simulation | Average resources to needs 100-200% PL before CTC simulation | Average resources to needs 100-200% PL after CTC simulation | Percent increase in resources to needs <100-200% PL due to CTC simulation | Average resources to needs >200% PL before CTC simulation | Average resources to needs >200% PL after CTC simulation | Percent increase in resources to needs >200% PL due to CTC simulation |
|----------------------|-----------------------------------------------------------|----------------------------------------------------------|-----------------------------------------------------------------------|--------------------------------------------------------------|-------------------------------------------------------------|---------------------------------------------------------------------------|-----------------------------------------------------------|----------------------------------------------------------|-----------------------------------------------------------------------|
| Alabama              | 0.66                                                      | 0.67                                                     | 0.76                                                                  | 1.44                                                         | 1.45                                                        | 1.32                                                                      | 4.94                                                      | 4.95                                                     | 0.29                                                                  |
| Alaska               | 0.60                                                      | 0.61                                                     | 1.23                                                                  | 1.49                                                         | 1.51                                                        | 1.24                                                                      | 3.97                                                      | 3.99                                                     | 0.34                                                                  |
| Arizona              | 0.68                                                      | 0.69                                                     | 1.45                                                                  | 1.43                                                         | 1.46                                                        | 1.47                                                                      | 3.85                                                      | 3.87                                                     | 0.37                                                                  |
| Arkansas             | 0.72                                                      | 0.73                                                     | 0.83                                                                  | 1.47                                                         | 1.49                                                        | 1.30                                                                      | 4.07                                                      | 4.08                                                     | 0.40                                                                  |
| California           | 0.71                                                      | 0.72                                                     | 1.29                                                                  | 1.39                                                         | 1.41                                                        | 1.14                                                                      | 4.45                                                      | 4.46                                                     | 0.16                                                                  |
| Colorado             | 0.72                                                      | 0.73                                                     | 1.45                                                                  | 1.44                                                         | 1.46                                                        | 1.33                                                                      | 4.81                                                      | 4.82                                                     | 0.21                                                                  |
| Connecticut          | 0.70                                                      | 0.71                                                     | 1.31                                                                  | 1.47                                                         | 1.48                                                        | 1.09                                                                      | 5.59                                                      | 5.59                                                     | 0.11                                                                  |
| Delaware             | 0.74                                                      | 0.74                                                     | 0.93                                                                  | 1.42                                                         | 1.44                                                        | 1.20                                                                      | 3.54                                                      | 3.55                                                     | 0.35                                                                  |
| District of Columbia | 0.74                                                      | 0.75                                                     | 0.66                                                                  | 1.34                                                         | 1.36                                                        | 0.82                                                                      | 5.28                                                      | 5.28                                                     | 0.06                                                                  |
| Florida              | 0.69                                                      | 0.70                                                     | 1.11                                                                  | 1.43                                                         | 1.45                                                        | 1.24                                                                      | 5.10                                                      | 5.11                                                     | 0.21                                                                  |
| Georgia              | 0.73                                                      | 0.74                                                     | 1.14                                                                  | 1.45                                                         | 1.47                                                        | 1.39                                                                      | 4.60                                                      | 4.61                                                     | 0.28                                                                  |
| Hawaii               | 0.78                                                      | 0.78                                                     | 1.03                                                                  | 1.42                                                         | 1.44                                                        | 1.02                                                                      | 3.88                                                      | 3.89                                                     | 0.16                                                                  |
| Idaho                | 0.68                                                      | 0.69                                                     | 1.94                                                                  | 1.49                                                         | 1.51                                                        | 1.65                                                                      | 4.30                                                      | 4.32                                                     | 0.45                                                                  |
| Illinois             | 0.70                                                      | 0.71                                                     | 1.18                                                                  | 1.42                                                         | 1.44                                                        | 1.36                                                                      | 5.74                                                      | 5.75                                                     | 0.19                                                                  |
| Indiana              | 0.71                                                      | 0.71                                                     | 0.93                                                                  | 1.48                                                         | 1.50                                                        | 1.37                                                                      | 4.26                                                      | 4.27                                                     | 0.35                                                                  |
| Iowa                 | 0.64                                                      | 0.65                                                     | 1.16                                                                  | 1.50                                                         | 1.52                                                        | 1.44                                                                      | 3.82                                                      | 3.84                                                     | 0.48                                                                  |
| Kansas               | 0.42                                                      | 0.43                                                     | 1.90                                                                  | 1.49                                                         | 1.51                                                        | 1.41                                                                      | 4.18                                                      | 4.20                                                     | 0.37                                                                  |
| Kentucky             | 0.67                                                      | 0.67                                                     | 0.72                                                                  | 1.50                                                         | 1.52                                                        | 1.26                                                                      | 3.92                                                      | 3.93                                                     | 0.43                                                                  |
| Louisiana            | 0.67                                                      | 0.68                                                     | 0.89                                                                  | 1.45                                                         | 1.47                                                        | 1.27                                                                      | 4.80                                                      | 4.81                                                     | 0.27                                                                  |



|                |      |      |       |      |      |      |      |      |      |
|----------------|------|------|-------|------|------|------|------|------|------|
| Maine          | 0.75 | 0.76 | 0.66  | 1.51 | 1.53 | 1.19 | 4.38 | 4.39 | 0.32 |
| Maryland       | 0.72 | 0.73 | 1.31  | 1.47 | 1.48 | 1.08 | 4.33 | 4.34 | 0.18 |
| Massachusetts  | 0.69 | 0.70 | 1.05  | 1.44 | 1.46 | 1.10 | 4.44 | 4.45 | 0.14 |
| Michigan       | 0.72 | 0.72 | 0.82  | 1.51 | 1.53 | 1.34 | 4.27 | 4.28 | 0.31 |
| Minnesota      | 0.70 | 0.71 | 1.20  | 1.50 | 1.52 | 1.32 | 4.64 | 4.66 | 0.27 |
| Mississippi    | 0.75 | 0.76 | 0.75  | 1.47 | 1.49 | 1.30 | 4.29 | 4.31 | 0.37 |
| Missouri       | 0.71 | 0.72 | 0.85  | 1.46 | 1.48 | 1.42 | 5.22 | 5.23 | 0.28 |
| Montana        | 0.70 | 0.70 | 0.86  | 1.52 | 1.55 | 1.42 | 4.66 | 4.68 | 0.35 |
| Nebraska       | 0.70 | 0.71 | 1.16  | 1.52 | 1.54 | 1.38 | 4.52 | 4.54 | 0.37 |
| Nevada         | 0.63 | 0.64 | 1.69  | 1.41 | 1.43 | 1.28 | 4.15 | 4.16 | 0.29 |
| New Hampshire  | 0.69 | 0.70 | 1.21  | 1.52 | 1.53 | 1.13 | 4.45 | 4.46 | 0.24 |
| New Jersey     | 0.69 | 0.70 | 1.01  | 1.41 | 1.43 | 1.07 | 4.75 | 4.76 | 0.16 |
| New Mexico     | 0.69 | 0.70 | 0.73  | 1.51 | 1.53 | 1.30 | 5.71 | 5.73 | 0.27 |
| New York       | 0.70 | 0.70 | 0.00  | 1.43 | 1.43 | 0.00 | 4.68 | 4.68 | 0.00 |
| North Carolina | 0.71 | 0.70 | -0.57 | 1.47 | 1.48 | 0.86 | 4.69 | 4.70 | 0.23 |
| North Dakota   | 0.56 | 0.57 | 1.11  | 1.59 | 1.62 | 1.40 | 4.96 | 4.98 | 0.36 |
| Ohio           | 0.69 | 0.70 | 0.93  | 1.49 | 1.51 | 1.32 | 4.22 | 4.23 | 0.38 |
| Oklahoma       | 0.69 | 0.70 | 1.06  | 1.50 | 1.52 | 1.25 | 4.38 | 4.40 | 0.35 |
| Oregon         | 0.57 | 0.58 | 2.21  | 1.44 | 1.46 | 1.31 | 4.00 | 4.01 | 0.32 |
| Pennsylvania   | 0.70 | 0.71 | 0.80  | 1.51 | 1.53 | 1.27 | 4.75 | 4.76 | 0.28 |
| Rhode Island   | 0.73 | 0.74 | 0.95  | 1.43 | 1.44 | 1.16 | 4.19 | 4.20 | 0.28 |
| South Carolina | 0.61 | 0.61 | 0.70  | 1.48 | 1.50 | 1.38 | 3.84 | 3.85 | 0.43 |
| South Dakota   | 0.25 | 0.26 | 3.20  | 1.55 | 1.57 | 1.41 | 4.71 | 4.73 | 0.40 |
| Tennessee      | 0.71 | 0.72 | 1.00  | 1.48 | 1.50 | 1.34 | 4.23 | 4.25 | 0.40 |
| Texas          | 0.70 | 0.71 | 1.29  | 1.44 | 1.46 | 1.37 | 4.56 | 4.58 | 0.32 |
| Utah           | 0.71 | 0.73 | 2.14  | 1.50 | 1.52 | 1.55 | 3.96 | 3.98 | 0.45 |
| Vermont        | 0.76 | 0.77 | 1.17  | 1.49 | 1.51 | 1.22 | 3.84 | 3.86 | 0.38 |
| Virginia       | 0.61 | 0.62 | 1.29  | 1.48 | 1.49 | 1.27 | 4.54 | 4.55 | 0.20 |
| Washington     | 0.74 | 0.75 | 1.03  | 1.49 | 1.51 | 1.28 | 4.24 | 4.26 | 0.30 |

|                          |      |      |      |      |      |      |      |      |      |
|--------------------------|------|------|------|------|------|------|------|------|------|
| West Virginia            | 0.64 | 0.64 | 0.76 | 1.54 | 1.56 | 1.22 | 4.56 | 4.57 | 0.40 |
| Wisconsin                | 0.71 | 0.72 | 1.12 | 1.51 | 1.53 | 1.40 | 4.50 | 4.52 | 0.35 |
| Wyoming                  | 0.35 | 0.36 | 2.85 | 1.56 | 1.59 | 1.49 | 4.04 | 4.06 | 0.44 |
| <b>Nation as a whole</b> | 0.69 | 0.70 | 1.12 | 1.46 | 1.48 | 1.22 | 4.53 | 4.54 | 0.27 |
